# Supplementary material
Source: HighWire-hosted journal article supplement (http://www.qdcxjkg.com/highwire/filestream/126817/field_highwire_adjunct_files/0/ERJ-01312-2015_Supplement.pdf)
Supplement: ERJ-01312-2015_Supplement.pdf [file ERJ-01312-2015_Supplement.pdf]

## Supplement

| Variable                                                 | Values                   | Points |
|----------------------------------------------------------|--------------------------|--------|
| Age                                                      | <50                      | 0      |
|                                                          | 50-69                    | 2      |
|                                                          | 70-79                    | 4      |
|                                                          | 80+                      | 6      |
| BMI                                                      | <18.5                    | 2      |
|                                                          | 18.5-25                  | 0      |
|                                                          | 26-30                    | 0      |
|                                                          | >30                      | 0      |
| FEV1                                                     | >80                      | 0      |
|                                                          | 50-80                    | 1      |
|                                                          | 30-49                    | 2      |
|                                                          | <30                      | 3      |
| Previous Hospital Admission                              | Yes                      | 5      |
|                                                          | No                       | 0      |
| No exacerbations in previous year                        | 0                        | 0      |
|                                                          | 1-2                      | 0      |
|                                                          | 3+                       | 2      |
|                                                          | MRC breathlessness score | 1-3    |
|                                                          | 4                        | 2      |
|                                                          | 5                        | 3      |
| Pseudomonas colonisation                                 | Yes                      | 3      |
|                                                          | No                       | 0      |
| Colonisation with other potentially pathogenic organisms | Yes                      | 1      |
|                                                          | No                       | 0      |
| Radiological Severity                                    | <3                       | 0      |
|                                                          | ≥3                       | 1      |
|                                                          | Or Cystic Bronchiectasis | 1      |
|                                                          | Maximum Score            | 26     |

Supplementary table S1: The BSI score (n=608) (9). A score of 0-4 was classed as mild disease (1 year outcomes: 0 - 2.8 % mortality rate, 0 - 3.4 % hospitalisation rate 4 year outcomes: 0 - 5.3 % mortality rate, 0 - 9.2 % hospitalisation rate), 5-8 moderate disease (1 year outcomes: 0.8 - 4.8 % mortality rate, 1.0 - 7.2 % hospitalisation rate 4 year outcomes: 4 % - 11.3 % mortality rate, 9.9 - 19.4 % hospitalisation rate), 9+ severe disease (1 year outcomes: 7.6 % - 10.5 % mortality rate, 16.7 - 52.6 % hospitalisation rate 4 year outcomes: 9.9 - 29.2 % mortality, 41.2 - 80.4 % hospitalisation rate).

| Variable                            | Values        | Points |
|-------------------------------------|---------------|--------|
| Chronic colonization by Pseudomonas | No            | 0      |
|                                     | Yes           | 1      |
| Dyspnoea MMRC score                 | 0-2           | 0      |
|                                     | 3-4           | 1      |
| FEV1                                | ≥50%          | 0      |
|                                     | <50%          | 2      |
| Age                                 | ≥70 years     | 2      |
|                                     | <70 years     | 0      |
| No. lobes involved                  | 1-2           | 0      |
|                                     | >2            | 1      |
|                                     | Maximum Score | 7      |

Supplementary table S2: The FACED score (n= 819) (10). A score of 0-2 was classed as mild disease (5 year mortality = 5.6%), 3-4 moderate disease (5 year mortality = 21.6%), 5-7 severe disease (5 year mortality = 55.0%).
